# Supplementary material
Source: HighWire-hosted journal article supplement (https://qdcxjkg.com/highwire/filestream/112858/field_highwire_adjunct_files/6/Figure_7.pdf)

Fig 7

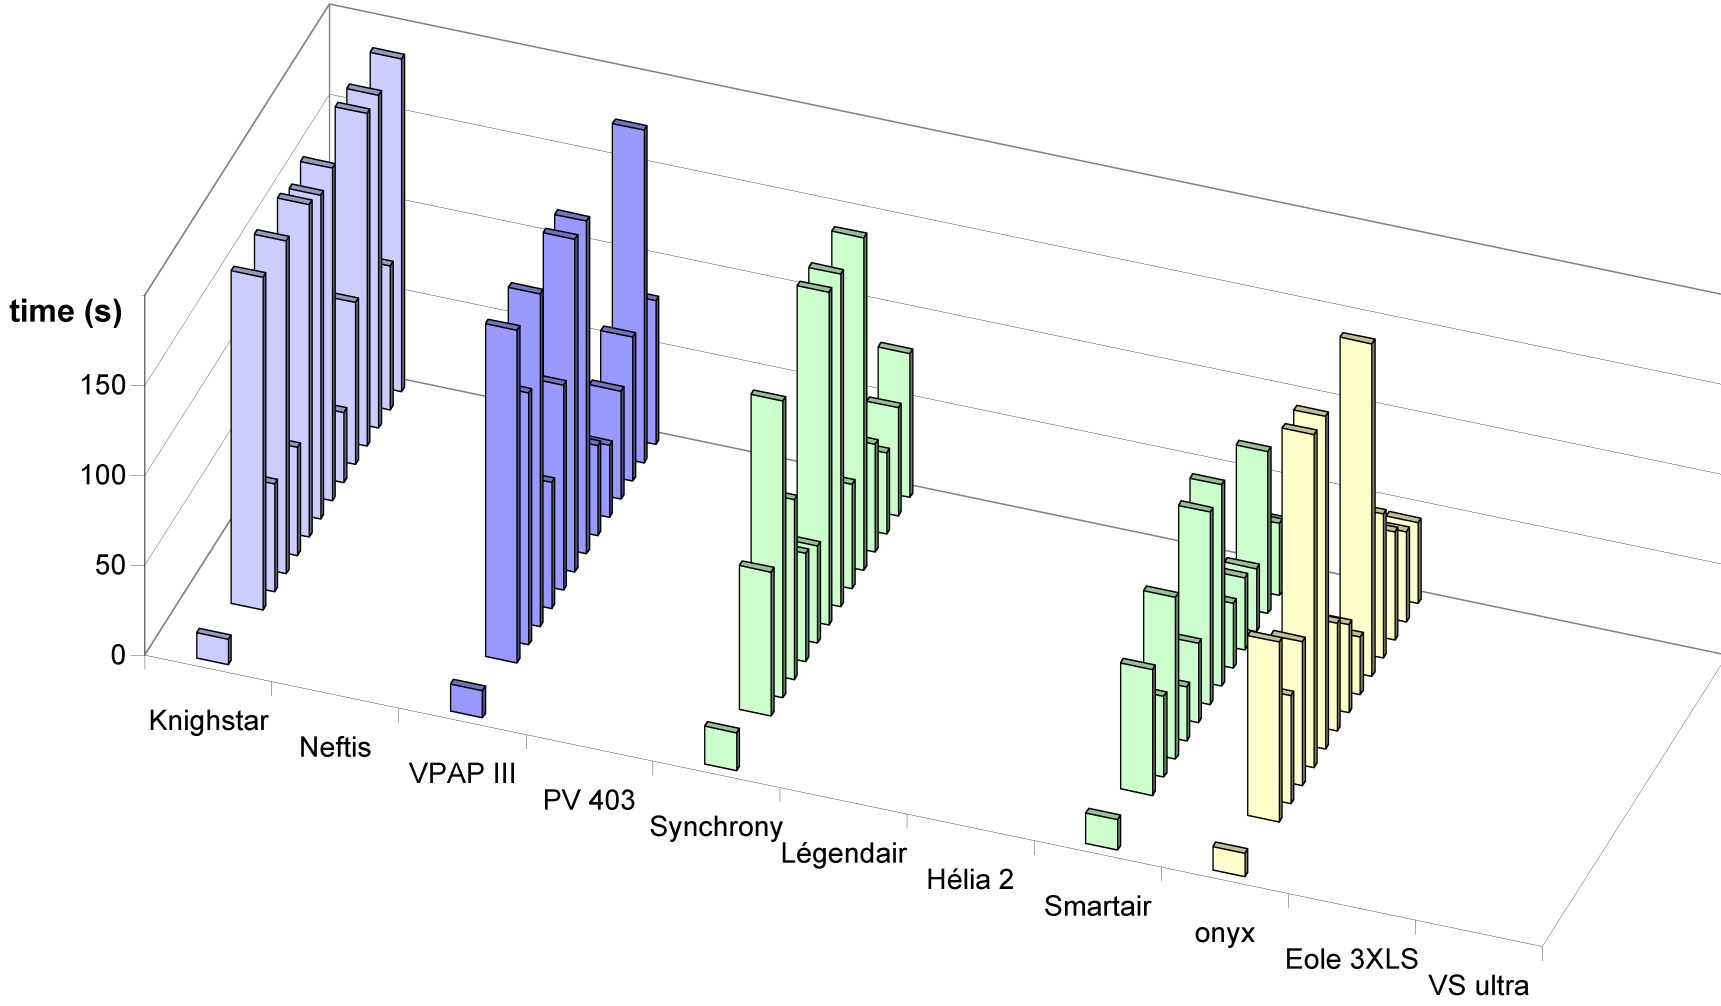

Supplement: Figure_7.pdf [file Figure_7.pdf]
